# Supplementary material
Source: publisher figshare collection journal article supplement (https://acs.figshare.com/ndownloader/files/4087783)
Supplement: Supplementary file 1 [file 4087783]

## Supporting Information

# Synthesis of Highly Fluorescent Silver Clusters on Gold(I) Surface

*Mainak Ganguly<sup>a</sup>, Anjali Pal<sup>b</sup>, Yuichi Negishi<sup>c</sup>, Tarasankar Pal<sup>a\*</sup>*

<sup>a</sup>Department of Chemistry, Indian Institute of Technology, Kharagpur-721302, India

<sup>b</sup>Department of Civil Engineering, Indian Institute of Technology, Kharagpur-721302, India

<sup>c</sup>Department of Applied Chemistry, Tokyo University of Science, Tokyo-1628601, Japan

**E-mail: [tpal@chem.iitkgp.ernet.in](mailto:tpal@chem.iitkgp.ernet.in)**

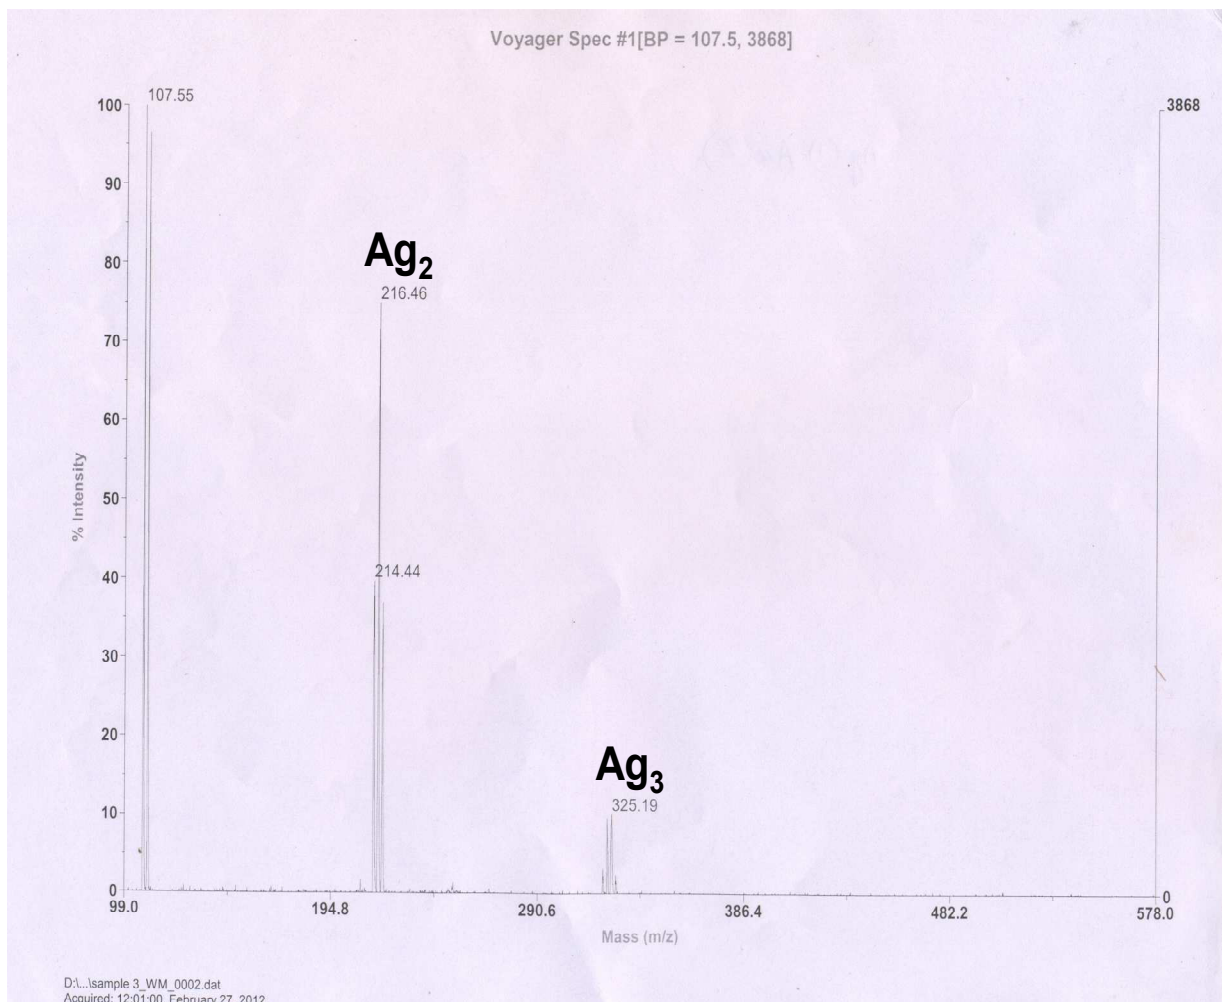

Figure S1: MALDI-TOF mass analysis of the drop-casted AuAgF1 (matrix free condition).

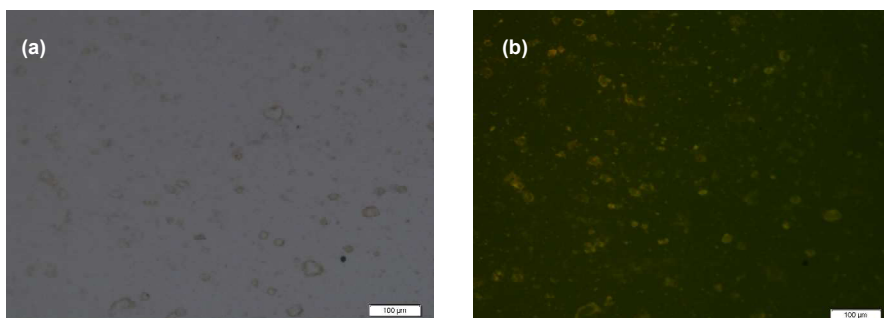

Figure S2: (a) Optical, (b) fluorescence image of drop-casted AuAgF1 on hydrophobic bakelite sheet under UV light exposure.

Low fluorescence intensity on bakelite sheet is due to non-transparent nature of the sheet.

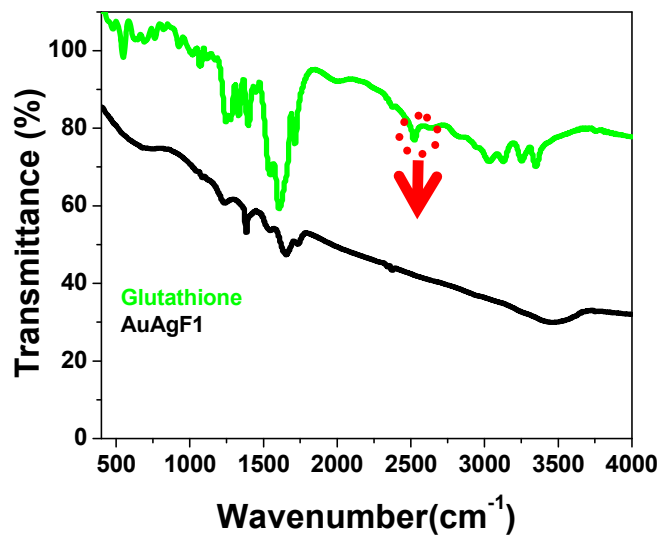

Figure S3: IR spectra of glutathione and AuAgF1.

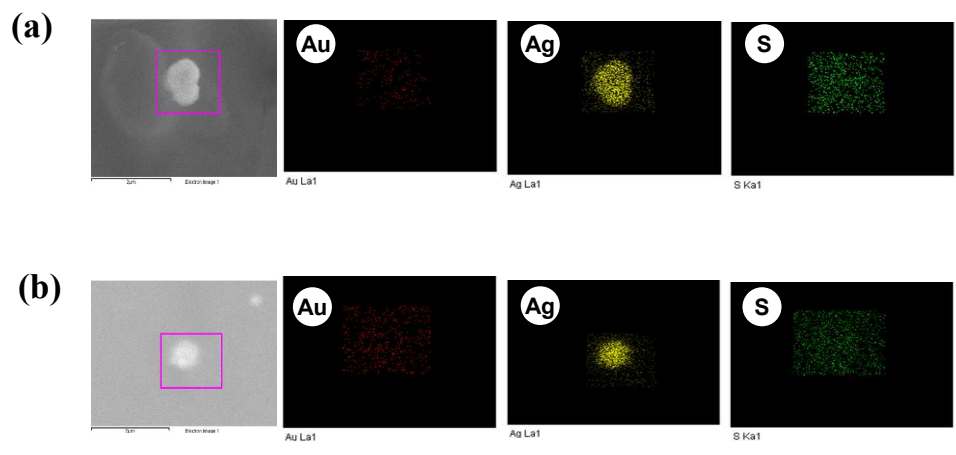

Figure S4: Area mapping for the elements Au, Ag, S (of a single sphere obtained from SEM image) of the solution (1) AuAgF2 and (2) AuAgF3.
